# Supplementary material for: Triazole appending ruthenium(ii) polypyridine complex for selective sensing of phosphate anions through C–H–anion interaction and copper(ii) ions via cancer cells
Source: Royal Society of Chemistry journal article supplement (doi:10.1039/d0nj00273a), 2020-01-01
Supplement: d0nj00273a1.pdf [file d0nj00273a1.pdf]

## Supporting Information

### **Triazole appending ruthenium (II) polypyridine complex for selective sensing of phosphate anions through C-H---anion interaction and copper (II) ions via cancer cells**

Mohanraj Ramachandran <sup>a</sup> and Sambandam Anandan <sup>\*a</sup>

<sup>a</sup>Department of Chemistry, National Institute of Technology, Tiruchirappalli 620 015, India

**TABLE OF CONTENT**

| <b>No.</b> | <b>Content</b>                                                                                                                                                                                      | <b>Fig. No.</b> | <b>Page. No.</b> |
|------------|-----------------------------------------------------------------------------------------------------------------------------------------------------------------------------------------------------|-----------------|------------------|
| 1.         | $^1\text{H}$ NMR spectrum of 1 in $\text{CDCl}_3$                                                                                                                                                   | <b>Fig. S1</b>  | 5                |
| 2.         | $^{13}\text{C}$ NMR spectrum of 1 in $\text{CDCl}_3$                                                                                                                                                | <b>Fig. S2</b>  | 5                |
| 3.         | $^1\text{H}$ NMR spectrum of 2 in $\text{CDCl}_3$                                                                                                                                                   | <b>Fig. S3</b>  | 6                |
| 4.         | $^{13}\text{C}$ NMR spectrum of 2 in $\text{CDCl}_3$                                                                                                                                                | <b>Fig. S4</b>  | 6                |
| 5.         | $^1\text{H}$ NMR spectrum of Btb in $\text{CDCl}_3$                                                                                                                                                 | <b>Fig. S5</b>  | 7                |
| 6.         | $^{13}\text{C}$ NMR spectrum of Btb in $\text{CDCl}_3$                                                                                                                                              | <b>Fig. S6</b>  | 7                |
| 7.         | $^1\text{H}$ NMR spectrum of Rbtb in $\text{DMSO-d}_6$                                                                                                                                              | <b>Fig. S7</b>  | 8                |
| 8.         | Expanded $^1\text{H}$ NMR spectrum of Rbtb in $\text{DMSO-d}_6$                                                                                                                                     | <b>Fig. S8</b>  | 8                |
| 9.         | $^1\text{H}$ NMR spectrum of Rbtb in $\text{CD}_3\text{CN}$                                                                                                                                         | <b>Fig. S9</b>  | 9                |
| 10.        | $^{13}\text{C}$ NMR spectrum of Rbtb in $\text{CD}_3\text{CN}$                                                                                                                                      | <b>Fig. S10</b> | 9                |
| 11.        | MALDI-TOF Mass spectrum of Btb                                                                                                                                                                      | <b>Fig. S11</b> | 10               |
| 12.        | MALDI-TOF Mass spectrum of Rbtb                                                                                                                                                                     | <b>Fig. S12</b> | 10               |
| 13.        | FT-IR spectra for compound 1, 2 (ATR Mode), Btb and Rbtb                                                                                                                                            | <b>Fig. S13</b> | 11               |
| 14.        | (A) UV-Vis spectra of Rbtb with gradual addition of two equiv. of $\text{H}_2\text{PO}_4^-$ (B) UV-Vis spectra of Rbtb with gradual addition of two equiv. of $\text{H}_2\text{P}_2\text{O}_7^{2-}$ | <b>Fig. S14</b> | 11               |
| 15.        | (A) Interference study of Rbtb- $\text{H}_2\text{PO}_4^-$ with mentioned anions (B) Interference study of Rbtb- $\text{H}_2\text{P}_2\text{O}_7^{2-}$ with mentioned anions                         | <b>Fig. S15</b> | 11               |
| 16.        | (A) Job's plot for Rbtb- $\text{H}_2\text{PO}_4^-$ (B) Job's plot for Rbtb- $\text{H}_2\text{P}_2\text{O}_7^{2-}$                                                                                   | <b>Fig. S16</b> | 12               |
| 17.        | (A) Under UV light illumination, Rbtb with mentioned anions (B) Under UV light illumination, Rbtb with mentioned metal ions                                                                         | <b>Fig. S17</b> | 12               |
| 18.        | NMR titration of Rbtb with $\text{H}_2\text{PO}_4^-$ in $\text{CD}_3\text{CN}/\text{CD}_3\text{OD}$                                                                                                 | <b>Fig. S18</b> | 13               |
| 19.        | (A) UV-Vis spectra of Rbtb with variety of metal ions (B) UV-Vis spectra of Rbtb with gradual addition of two equiv. of $\text{Cu}^{2+}$ ions                                                       | <b>Fig. S19</b> | 13               |
| 20.        | (A) Interference study of Rbtb- $\text{Cu}^{2+}$ with mentioned metal ions (B) linear plot of Rbtb- $\text{Cu}^{2+}$                                                                                | <b>Fig. S20</b> | 13               |
| 21.        | Stern-Volmer plot for the detection of $\text{Cu}^{2+}$ ion by relative fluorescence Rbtb in $\text{CH}_3\text{CN}/10\text{mM}$ HEPES buffer ( $\text{pH} = 7.4$ ).                                 | <b>Fig. S21</b> | 14               |
| 22.        | pH variation was monitored with Rbtb, Rbtb- $\text{Cu}^{2+}$                                                                                                                                        | <b>Fig. S22</b> | 14               |
| 23.        | The cyclic voltammogram of Rbtb, with phosphate and with copper (II) ions                                                                                                                           | <b>Fig. S23</b> | 14               |
| 24.        | Optimized geometry of Rbtb                                                                                                                                                                          | <b>Fig. S24</b> | 15               |

|     |                                                                                                  |                  |    |
|-----|--------------------------------------------------------------------------------------------------|------------------|----|
| 25. | Mass spectrum of [Rbtb-Cu <sup>2+</sup> ] adduct                                                 | <b>Fig. S25</b>  | 15 |
| 26. | Job's plot for Rbtb-Cu <sup>2+</sup>                                                             | <b>Fig. S26</b>  | 15 |
| 27. | EPR Spectra of Rbtb+Cu <sup>2+</sup> at LNT                                                      | <b>Fig. S27</b>  | 16 |
| 28. | Proposed mechanism of Rbtb-H <sub>2</sub> PO <sub>4</sub> <sup>-</sup> and Rbtb-Cu <sup>2+</sup> | <b>Fig. S28</b>  | 16 |
| 29. | DAPI staining                                                                                    | <b>Fig. S29</b>  | 17 |
| 30. | Comparative table for detection limit                                                            | <b>Table. S1</b> | 17 |
| 31. | References                                                                                       | -                | 18 |

## Synthetic procedure of compound 1 and 2

### 2-(2-propynyloxy)-1,3-benzothiazole (1)<sup>S1</sup>

In 100 ml round bottom flask, 2-hydroxybenzothiazole (1.208 g, 8 mmol), propargyl bromide (1.764 g, 12 mmol) and potassium carbonate (1.656 g, 12 mmol) in acetone (50 mL) was stirred for 4 h. After constant stirring, the solvent was evaporated using a rotatory evaporator. Then distilled water (30 mL) and dichloromethane (30 mL) was added to the reaction mixture and transferred to a separating funnel. The product was extracted into the organic layer, isolated and dried over sodium sulphate. Impure product was obtained upon the organic solvent was removed under reduced pressure and it was purified using flash column chromatography to get off white solid as 1 (1.347 g, 89 %). <sup>1</sup>H NMR (CDCl<sub>3</sub>, 500 MHz, ppm): δ = 7.44 (dd, 7.53 Hz, 1H), 7.36 (dd, 7.54 Hz, 1H), 7.25 (td, 8.54 Hz, 1H), 7.20 (td, 8.54 Hz, 1H), 4.76 (s, 2H), 2.30 (s, 1H). <sup>13</sup>C NMR (CDCl<sub>3</sub>, 150 MHz, ppm); δ = 169.38, 136.06, 125.50, 123.64, 122.68, 122.41, 111.17, 73.19 and 31.68.

### 4-azido-2,2'-bipyridyl (2)<sup>S2,S3</sup>

4-nitro-2,2'-bipyridyl (0.57 g, 0.4 mmol, 1 eq.) with NaN<sub>3</sub> (1.50 g, 3.85 mmol, 8.95 eq.) was heated in DMF (10 mL) for 5 hours at 100 °C. The solvent was removed under vacuum and water (40 mL) was added to the yellow solid, the aqueous phase was extracted with dichloromethane. The combined organic phase was dried over anhydrous sodium sulphate. The crude product was purified by flash silica column chromatography using dichloromethane/ethyl acetate (1:1) mixture. The yellow colour solid was obtained as 4-azido-2,2'-bipyridyl (yield, 0.52g, 93.54 %). <sup>1</sup>H NMR (CDCl<sub>3</sub>) δ (ppm): 8.69 (ddd, J = 4.8, 1.8 & 0.9 Hz, 1H, H-6'), 8.58 (d, J = 5.4 Hz, 1H, H-6), 8.40 (dt, J = 7.8 & 0.9 Hz, 1H, H-4'), 8.15 (d, J = 2.3 Hz, 1H, H-3), 7.82 (td, J = 7.8 & 1.8, 1H, H-5'), 7.34 (ddd, J = 7.5, 4.8 & 1.2, 1H, H-3'), 6.93 (dd, J = 5.4 & 2.3 Hz, 1H, H-5). (<sup>13</sup>C NMR, 100 MHz) δ (ppm): 162.5, 149.4, 148.8, 141.8, 138.4, 136.4, 125.6, 124.7, 117.5, 116.1. FT-IR (ATR): 2115 cm<sup>-1</sup> (s).

### Determination of the detection limit

The detection limit (LOD) of Rbtb towards anions and cation was calculated by  $3\sigma/S$ , where  $\sigma$  is the standard deviation of the blank studies and S is the slope of the calibration curve.

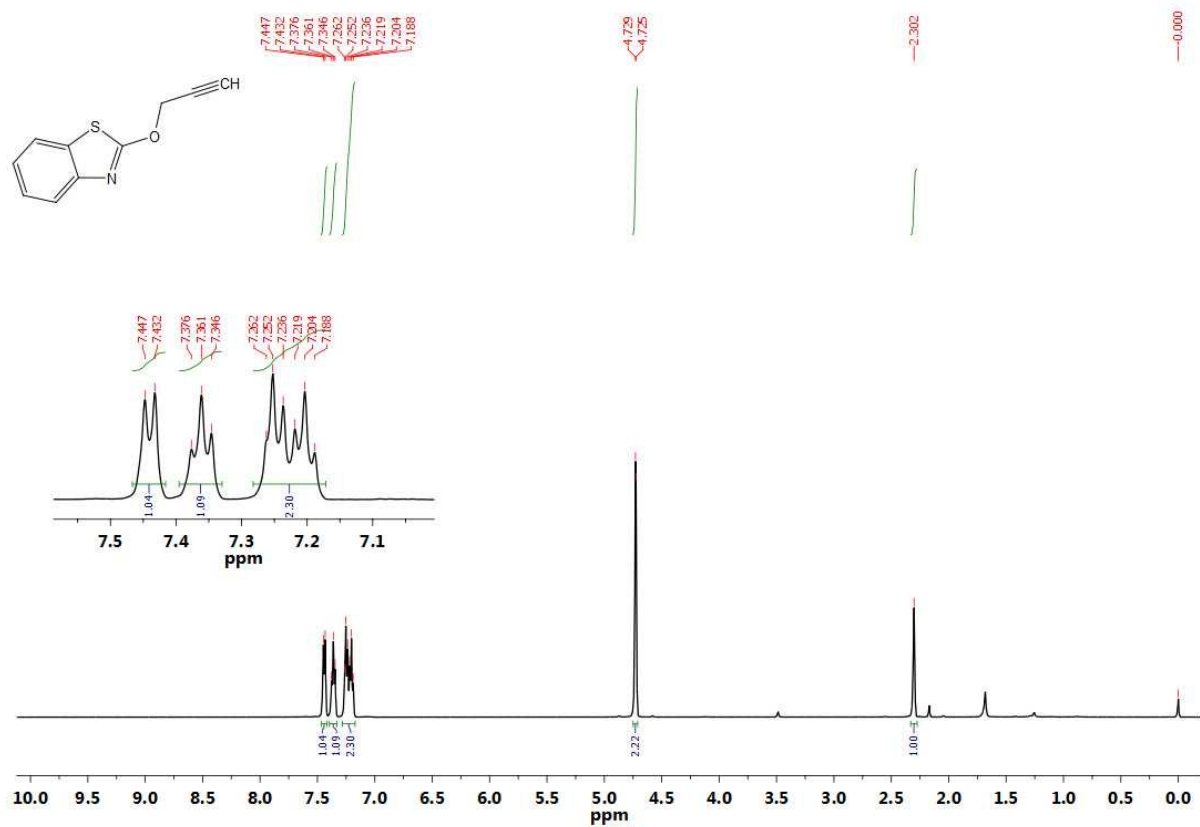

Fig. S1 <sup>1</sup>H NMR spectrum of **1** in CDCl<sub>3</sub>

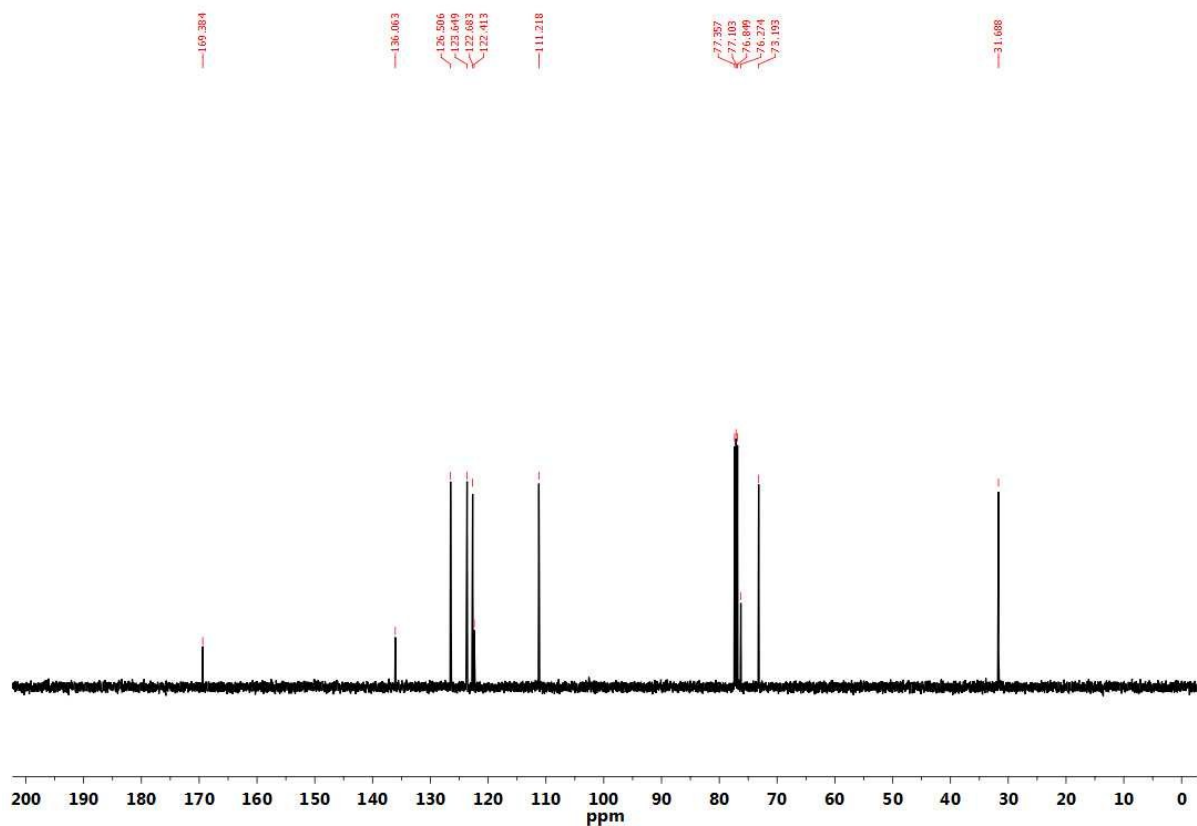

Fig. S2 <sup>13</sup>C NMR spectrum of **1** in CDCl<sub>3</sub>

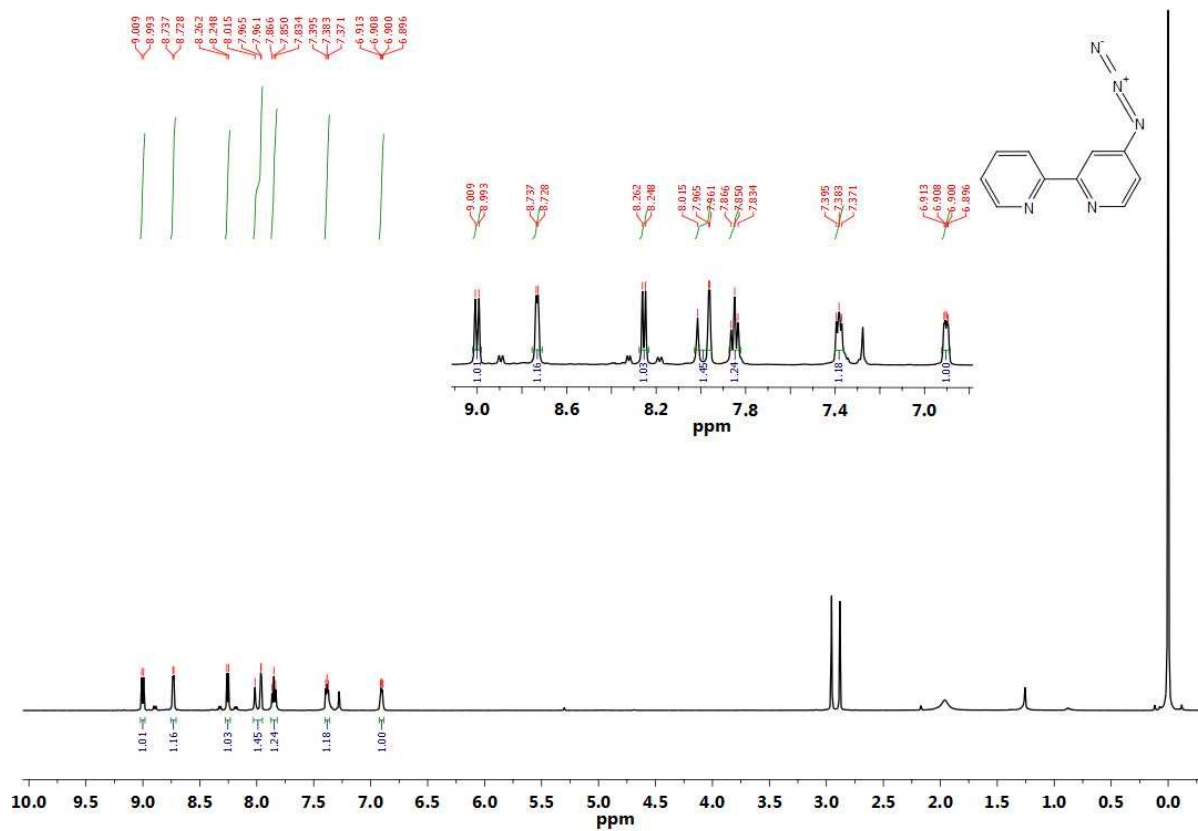

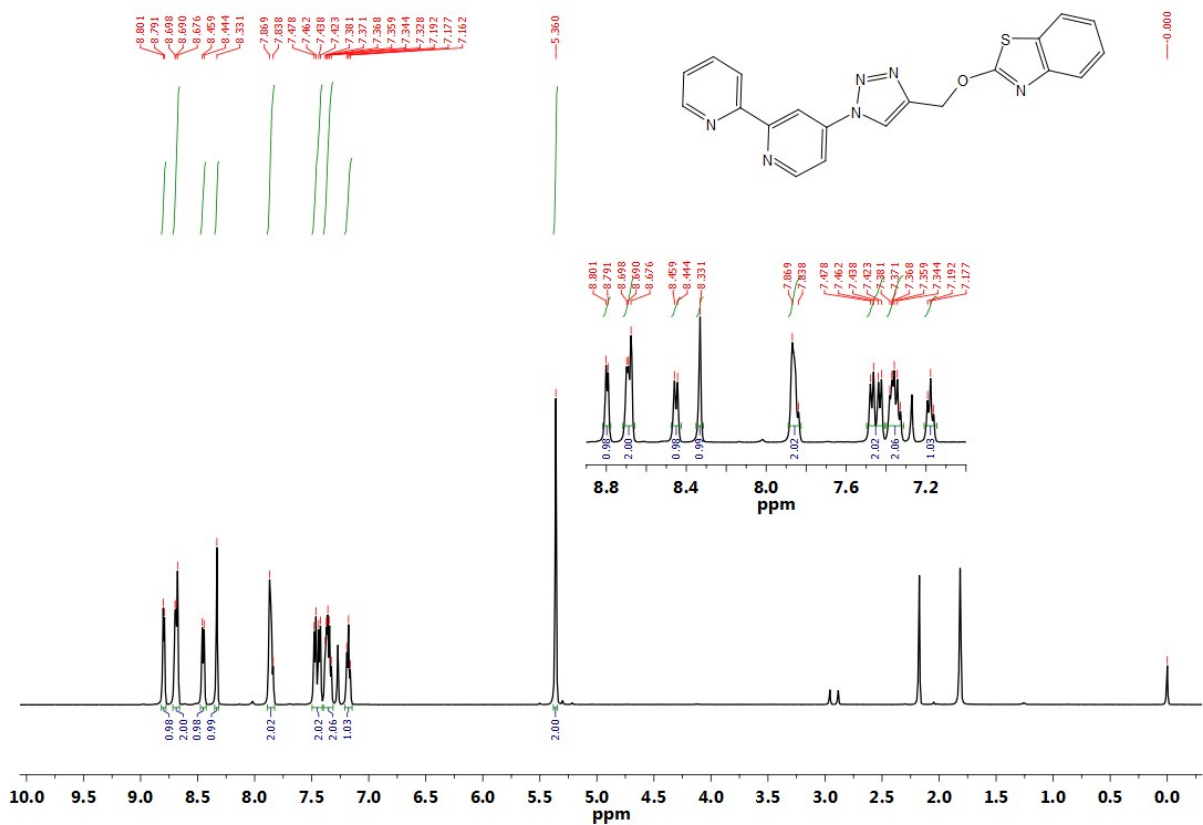

Fig. S5 <sup>1</sup>H NMR spectrum of Btb in CDCl<sub>3</sub>

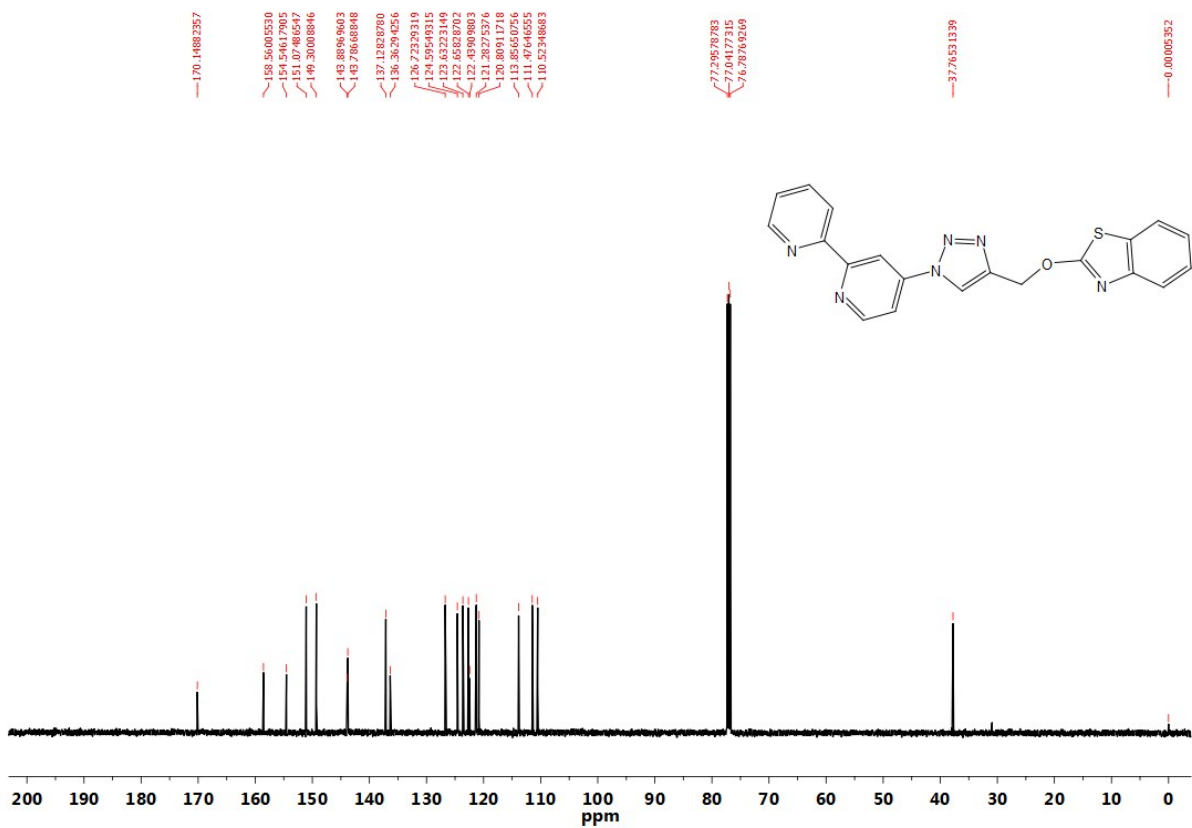

Fig. S6 <sup>13</sup>C NMR spectrum of Btb in CDCl<sub>3</sub>

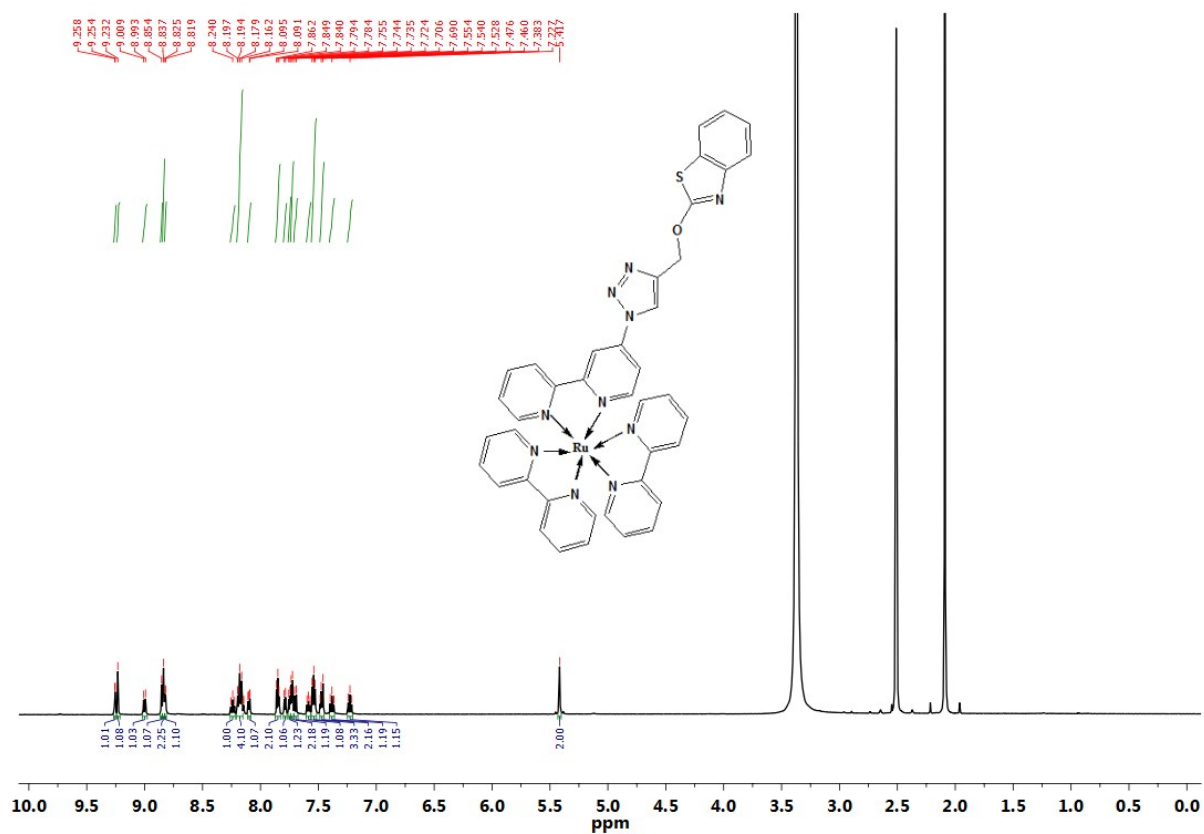

**Fig. S7**  $^1\text{H}$  NMR spectrum of **Rbtb** in  $\text{DMSO-d}_6$

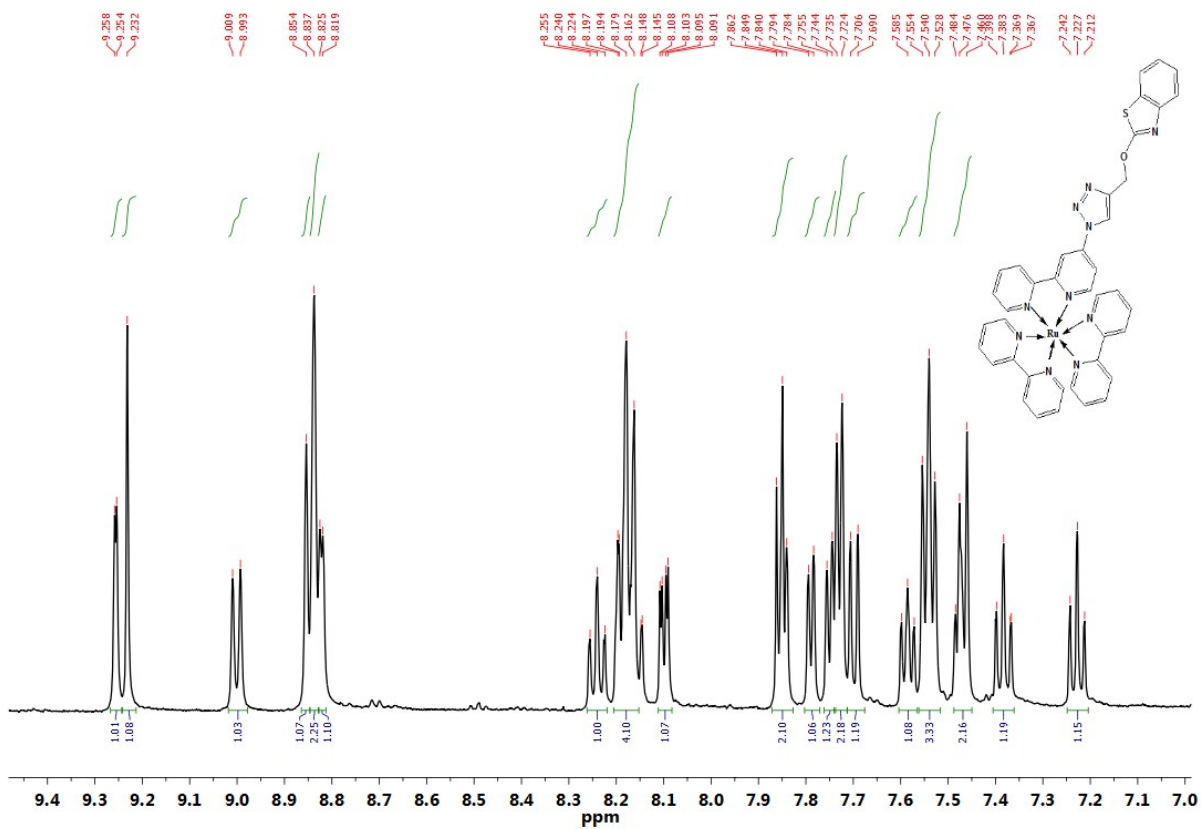

**Fig. S8** Expanded  $^1\text{H}$  NMR spectrum of **Rbtb** in  $\text{DMSO-d}_6$



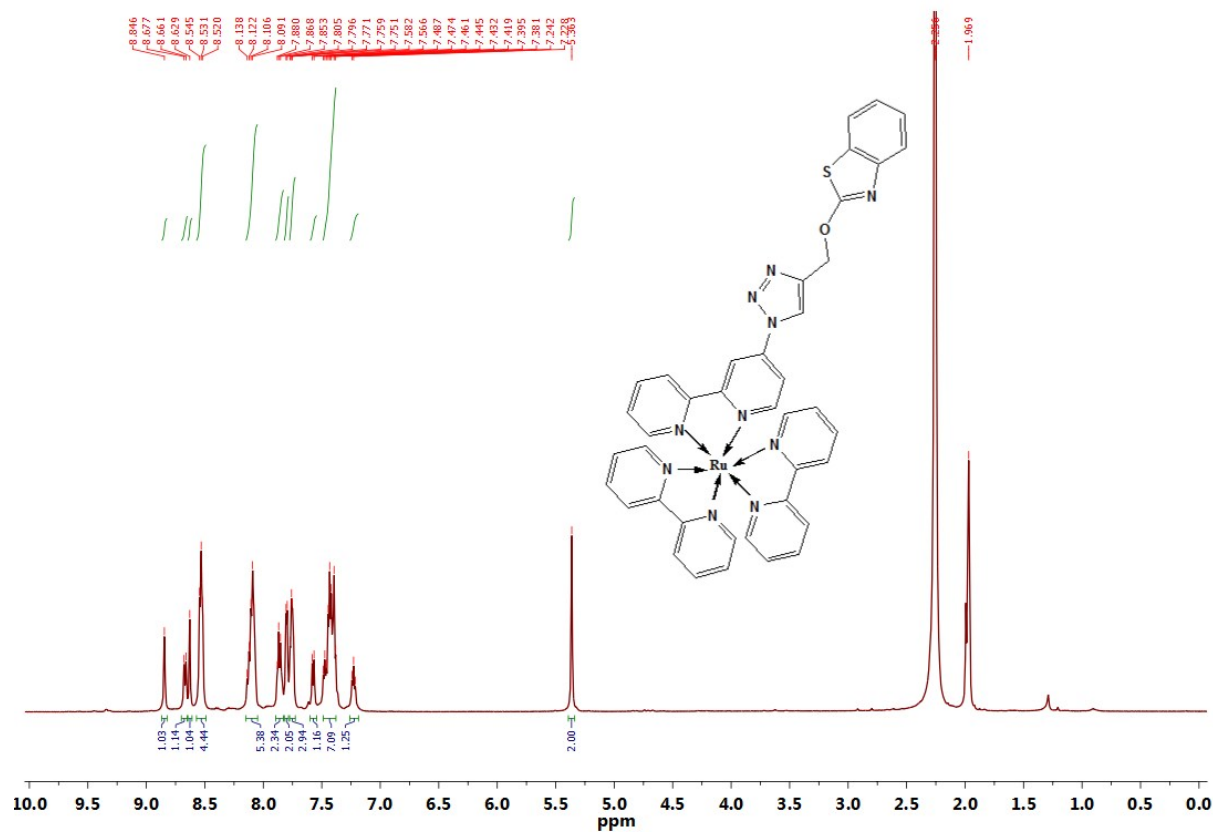

Fig. S9  $^1\text{H}$  NMR spectrum of Rbtb in  $\text{CD}_3\text{CN}$

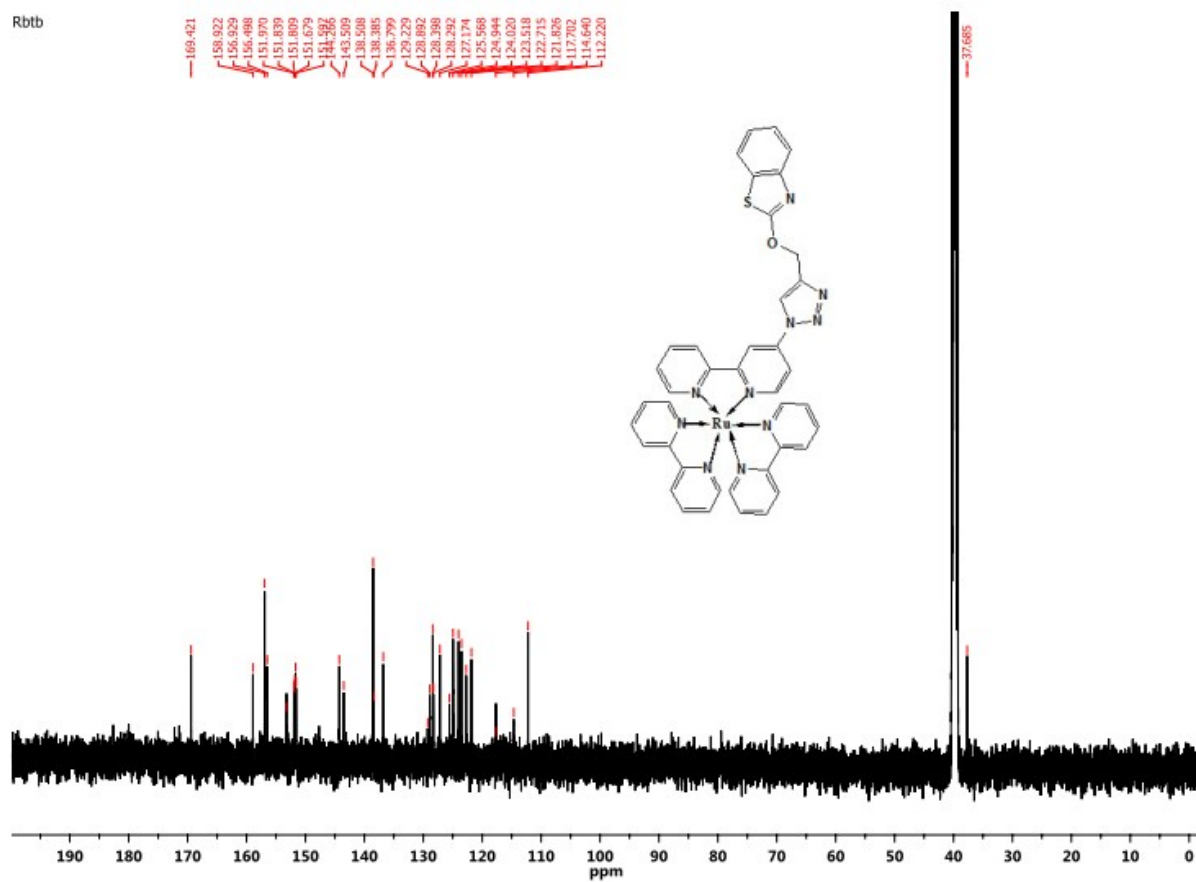

Fig. S10  $^{13}\text{C}$  NMR spectrum of Rbtb in  $\text{DMSO-d}_6$

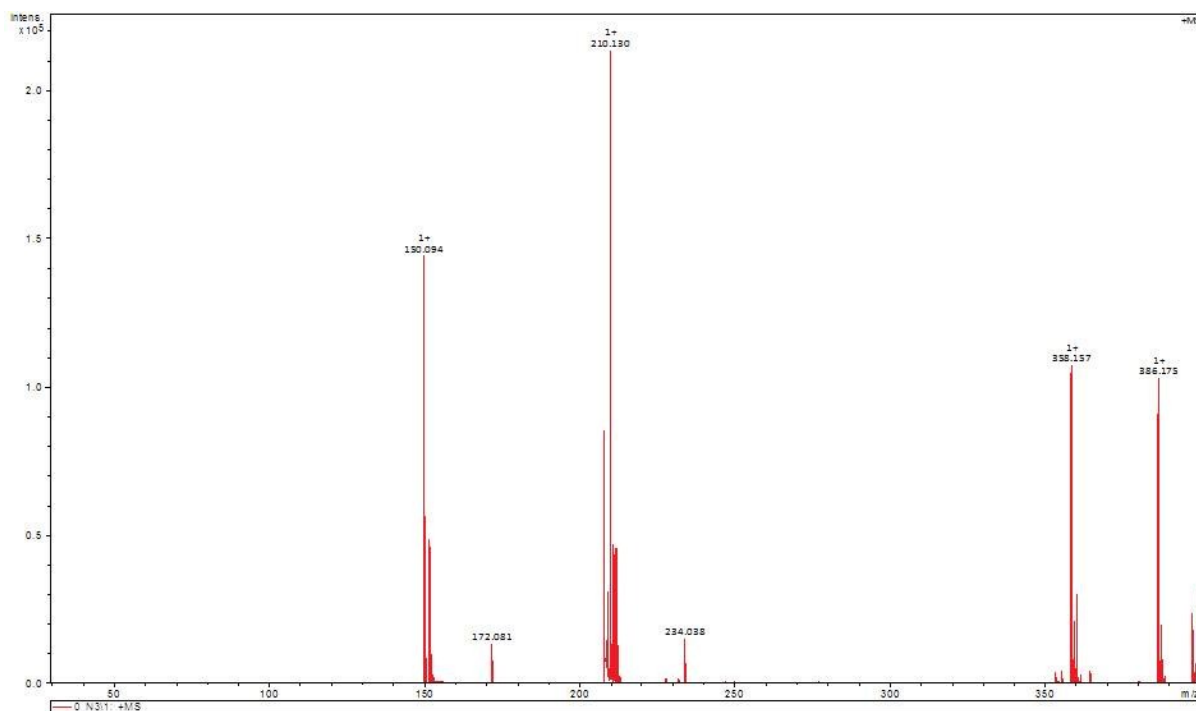

**Fig. S11** MALDI-TOF Mass spectrum of **Btb**

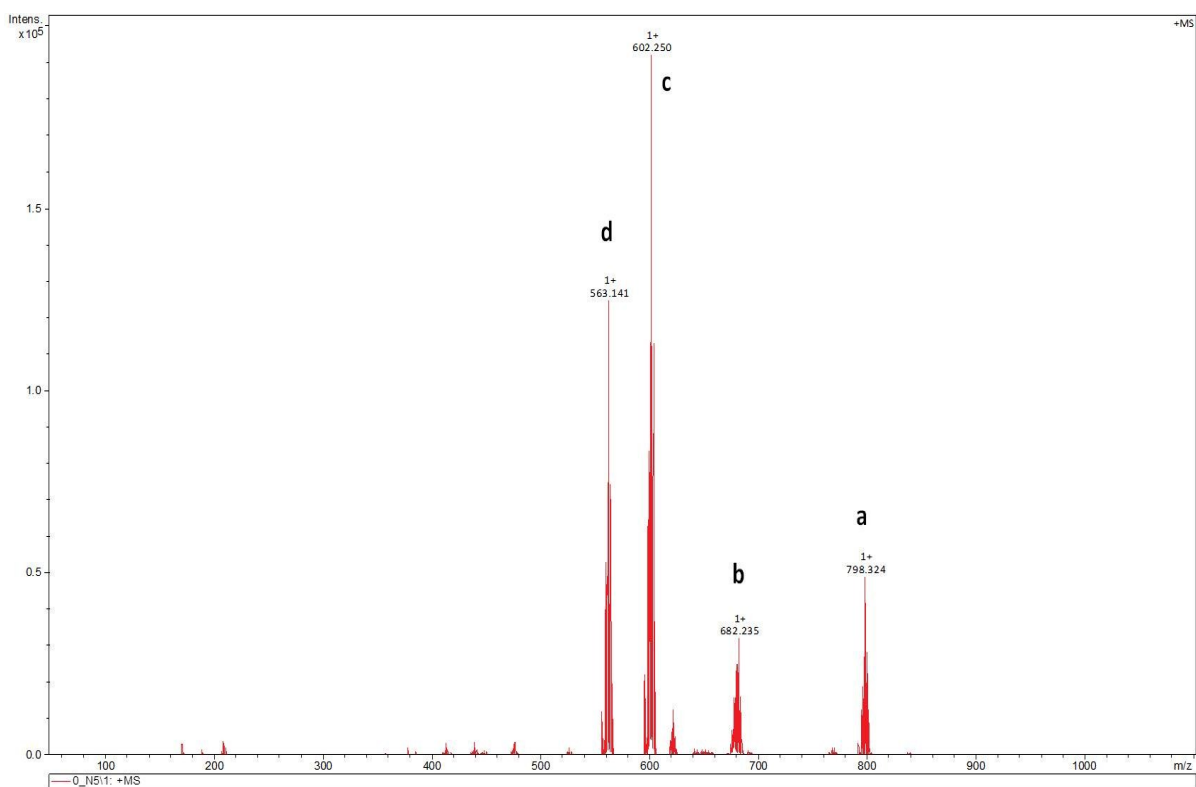

**Fig. S12** MALDI-TOF Mass spectrum of **Rbtb** {a =  $[M-H]^+$  ( $M = C_{40}H_{30}N_{10}OSRu$ ), b =  $[M+H]^+$  ( $M = C_{34}H_{29}N_9ORu$ ), c =  $[M+2H]^+$  ( $M = C_{30}H_{26}N_8Ru$ ), d =  $[M+K]^+$  ( $M = C_{24}H_{21}N_7ORu$ )}

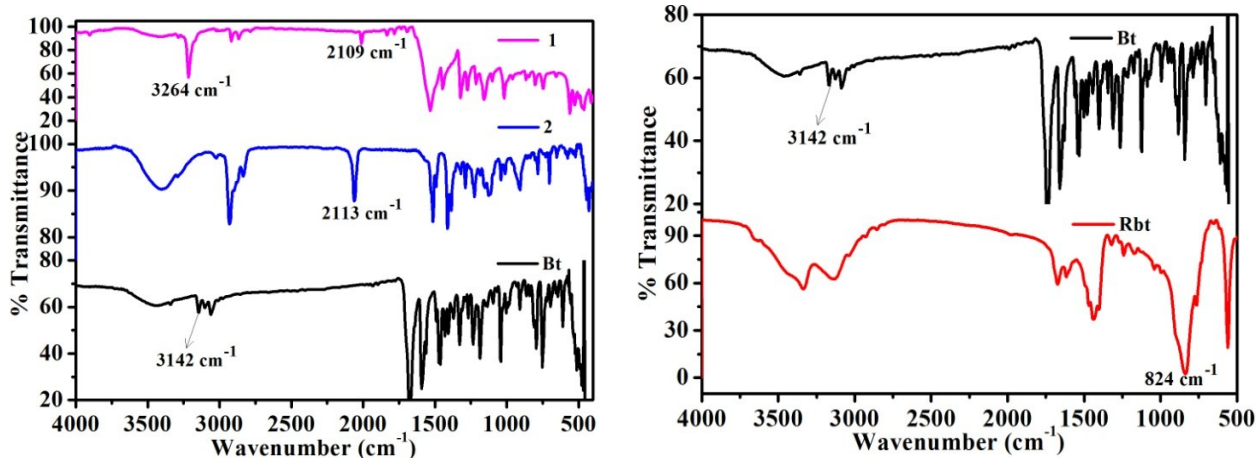

Fig. S13 FT-IR spectra of 1, 2, Btb and Rbtb

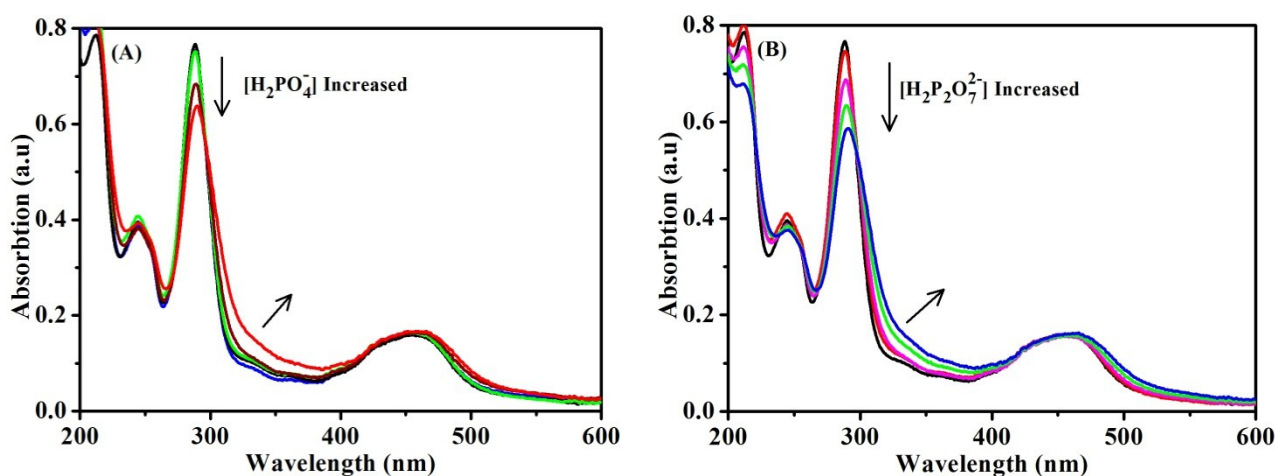

Fig. S14 (A) UV-Vis spectra of Rbtb (10  $\mu\text{M}$ ) with the gradual addition of two equiv. of  $\text{H}_2\text{PO}_4^-$  (B) UV-Vis spectra of Rbtb (10  $\mu\text{M}$ ) with the gradual addition of two equiv. of  $\text{H}_2\text{P}_2\text{O}_7^{2-}$

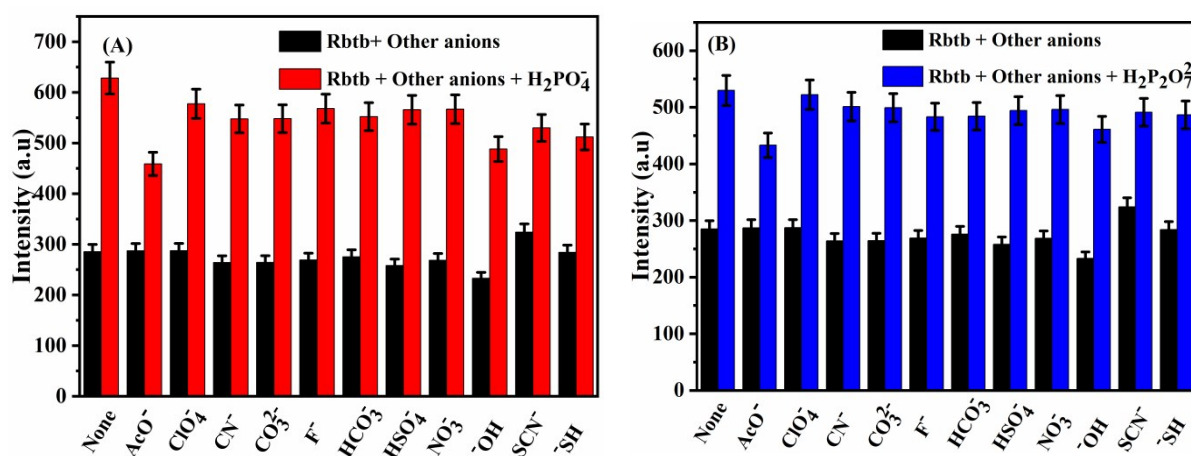

Fig. S15 (A) Interference study of Rbtb (10  $\mu\text{M}$ ) +  $\text{H}_2\text{PO}_4^-$  (2 equiv.) with mentioned other anions (10 equiv.) (B) Interference study of Rbtb (10  $\mu\text{M}$ ) +  $\text{H}_2\text{P}_2\text{O}_7^{2-}$  (2 equiv.) with mentioned other anions (10 equiv.).

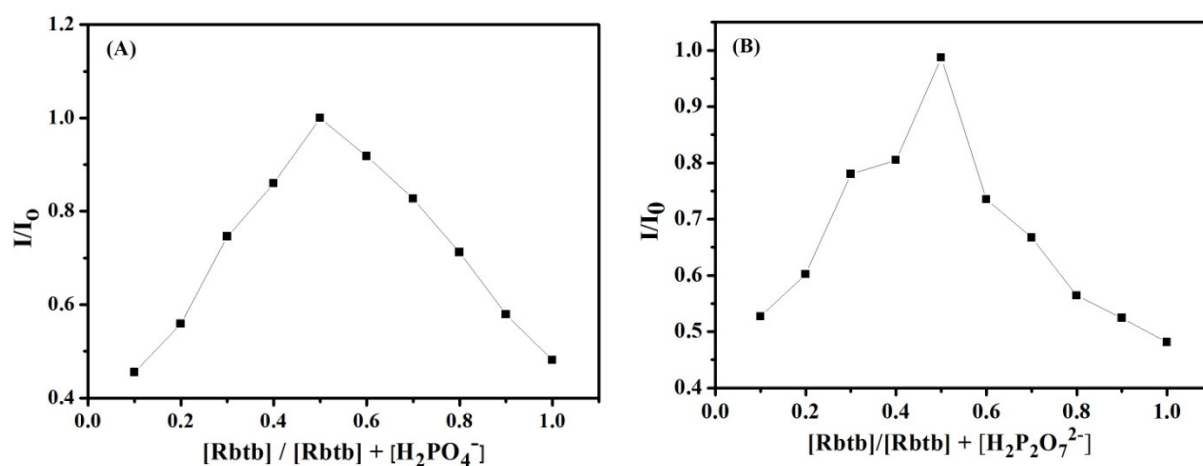

Fig. S16. (A) Job's plot for Rbtb- $H_2PO_4^-$  (B) Job's plot for Rbtb- $H_2P_2O_7^{2-}$

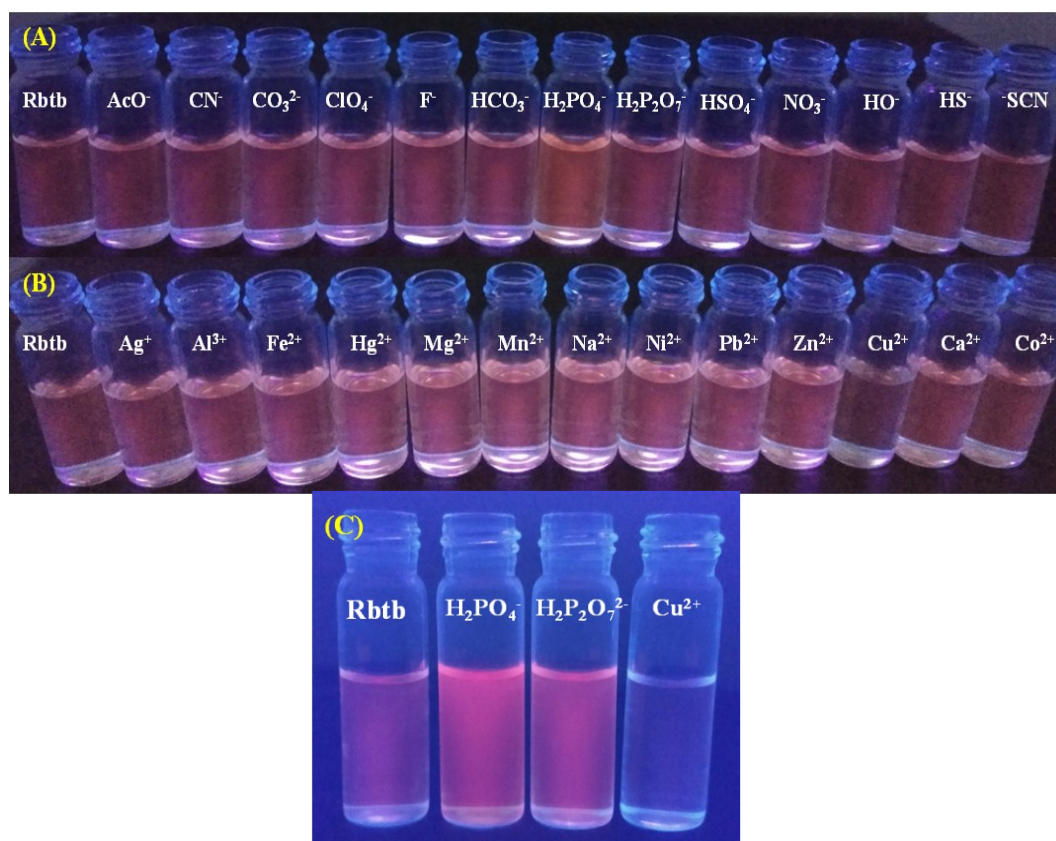

Fig. S17. (A) Under UV light illumination, Rbtb with mentioned other anions (B) Under UV light illumination, Rbtb with mentioned other metal ion (C) Under UV light illumination, closer look image of Rbtb, Rbtb+ $H_2PO_4^-$ , Rbtb+ $H_2P_2O_7^{2-}$  and Rbtb+ $Cu^{2+}$

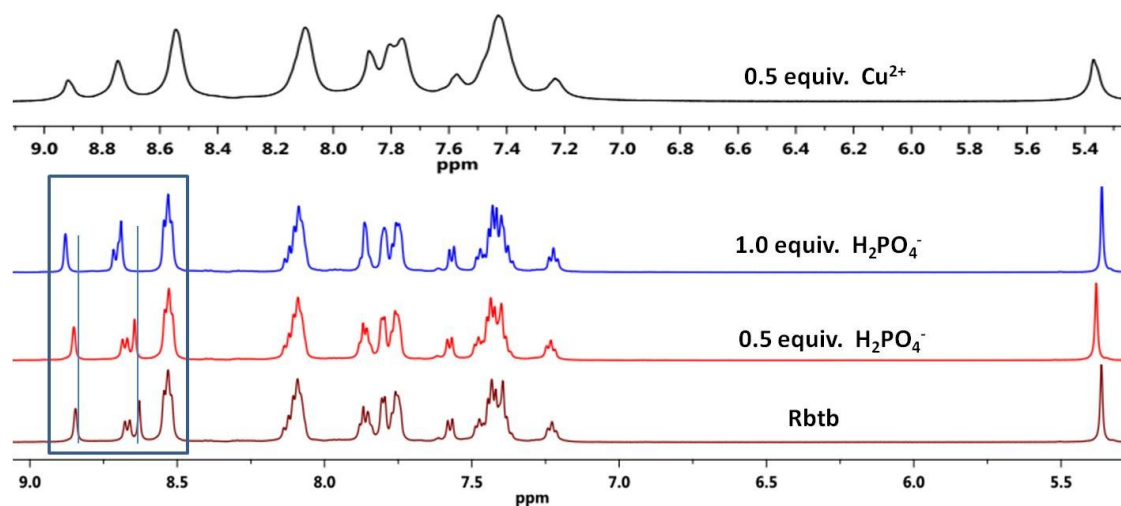

**Fig. S18.** NMR titration of Rbtb (4.5 mM) with  $\text{H}_2\text{PO}_4^-$  in  $\text{CD}_3\text{CN}/\text{CD}_3\text{OD}$  (9/1, v/v)

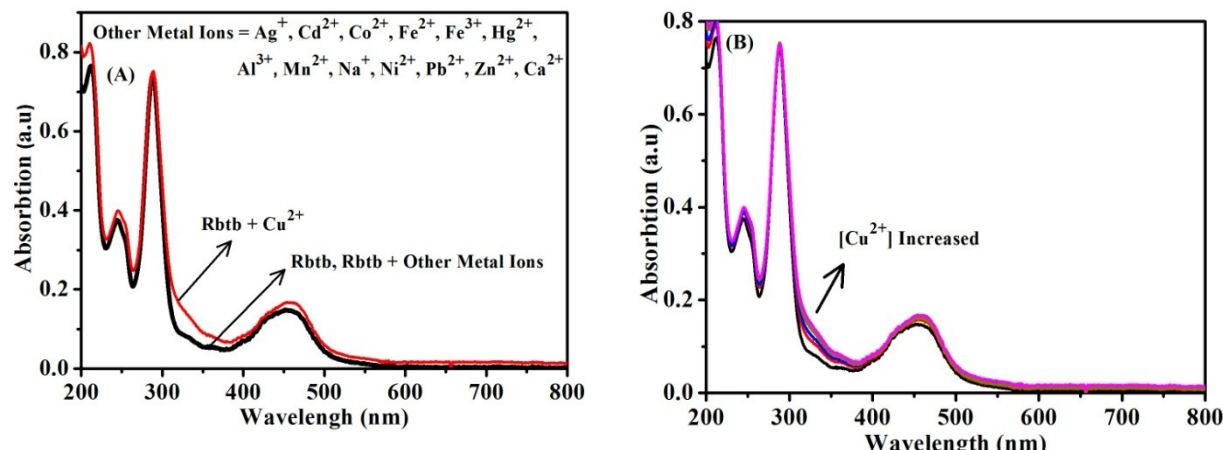

**Fig. S19.** (A) UV-Vis spectra of Rbtb (10  $\mu\text{M}$ ) with variety of metal ions (10 equiv.) and (B) UV-Vis spectra of Rbtb (10  $\mu\text{M}$ ) with gradual addition of two equiv. of  $\text{Cu}^{2+}$  ions in  $\text{CH}_3\text{CN}/10$  mM HEPES buffer (pH = 7.4) (9/1, v/v)

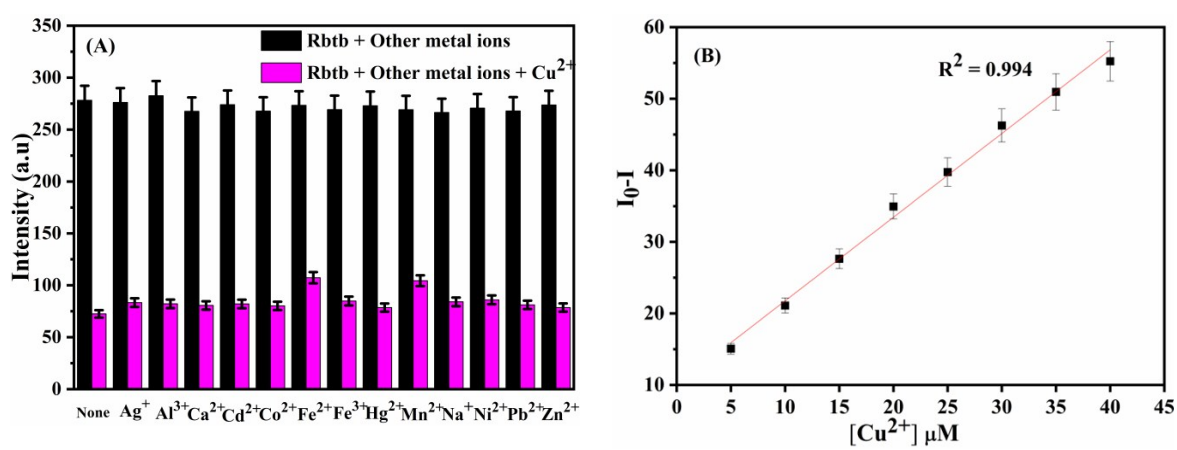

**Fig. S20.** (A) Interference study of Rbtb (10  $\mu\text{M}$ ) +  $\text{Cu}^{2+}$  (2 equiv.) with mentioned other metal ions (10 equiv.) (B) Linear plot of Rbtb- $\text{Cu}^{2+}$

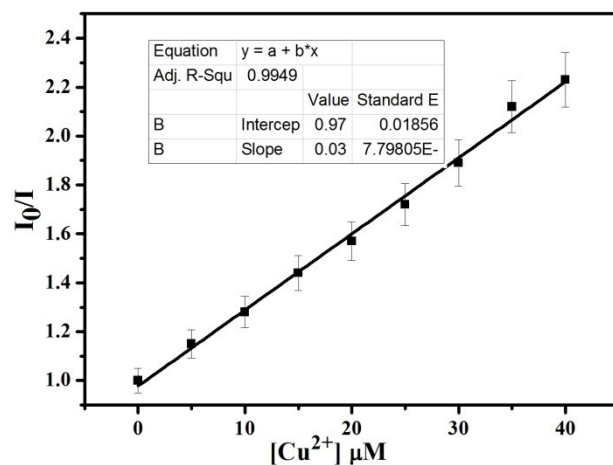

**Fig. S21.** Stern-Volmer plot for the detection of  $\text{Cu}^{2+}$  ion by relative fluorescence Rbtb in  $\text{CH}_3\text{CN}/10\text{mM}$  HEPES buffer (pH = 7.4).

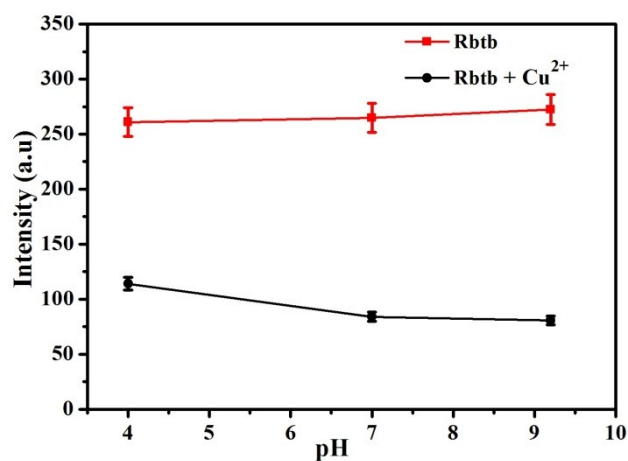

**Fig. S22.** pH variation was monitored with Rbtb, Rbtb- $\text{Cu}^{2+}$

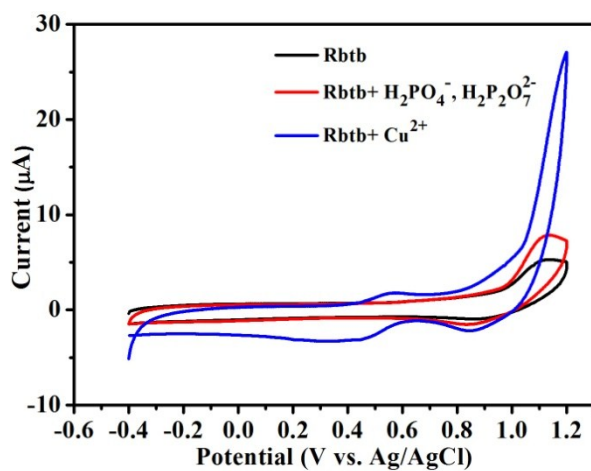

**Fig. S23.** The cyclic voltammogram of Rbtb, with phosphate and with copper (II) ions

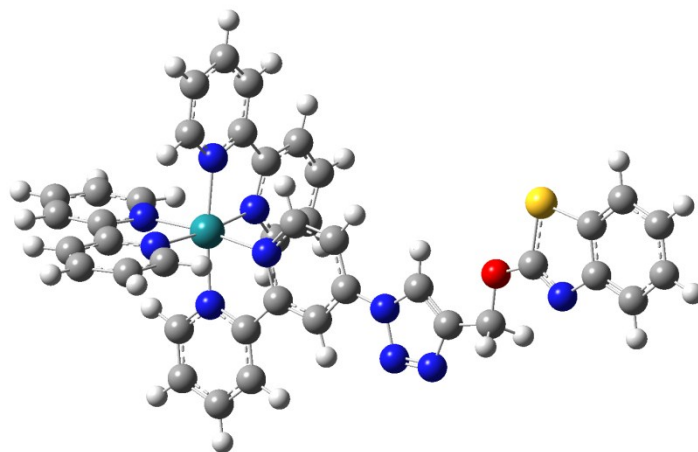

**Fig. S24.** Optimized geometry of Rbtb

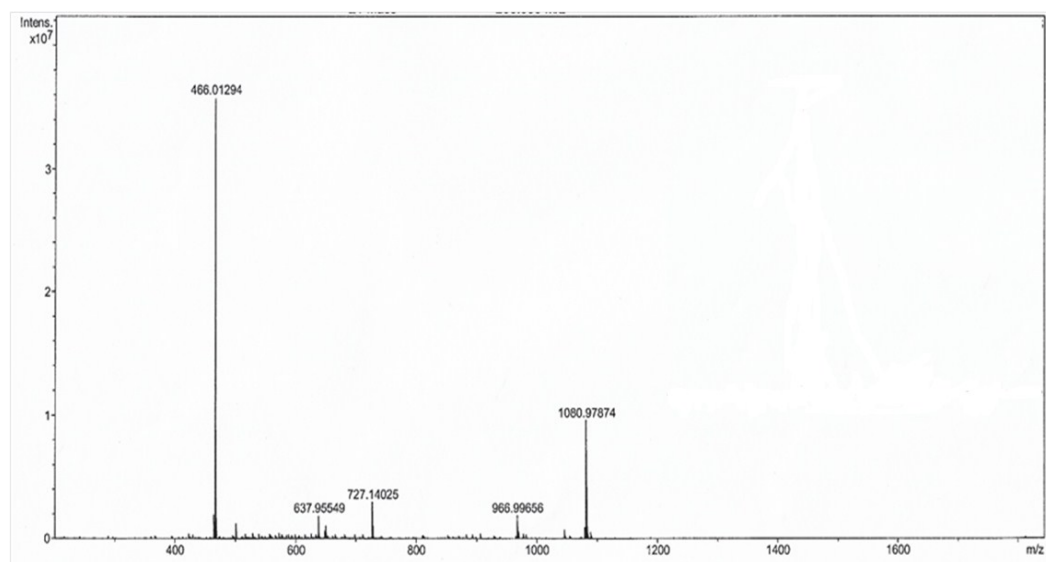

**Fig. S25.** HRMS of  $[\text{Rbtb-Cu}^{2+}]$  adduct  $\{[\text{C}_{40}\text{H}_{30}\text{Cl}_2\text{CuN}_{10}\text{ORuSPF}_6]^{2+}\}$ : Calcd:  $M = 1079.98$ ; Found:  $[\text{M}]^+ = 1080.97$

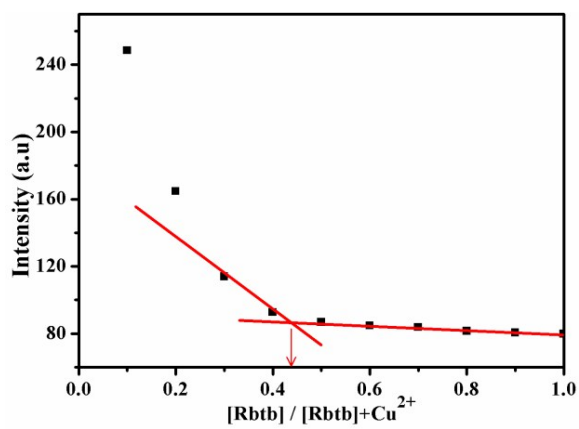

**Fig. S26.** Job's plot for  $\text{Rbtb-Cu}^{2+}$

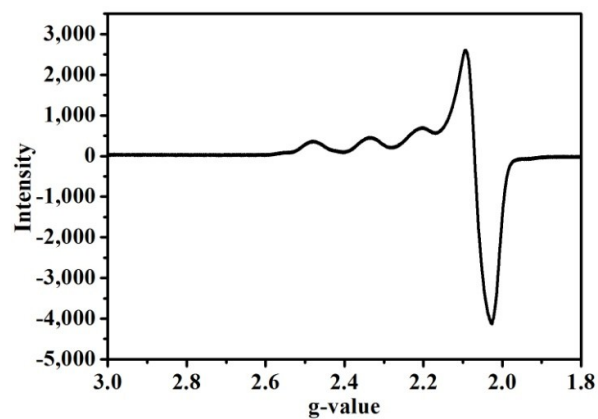

Fig. S27. EPR spectrum of Rbtb-Cu<sup>2+</sup> at LNT

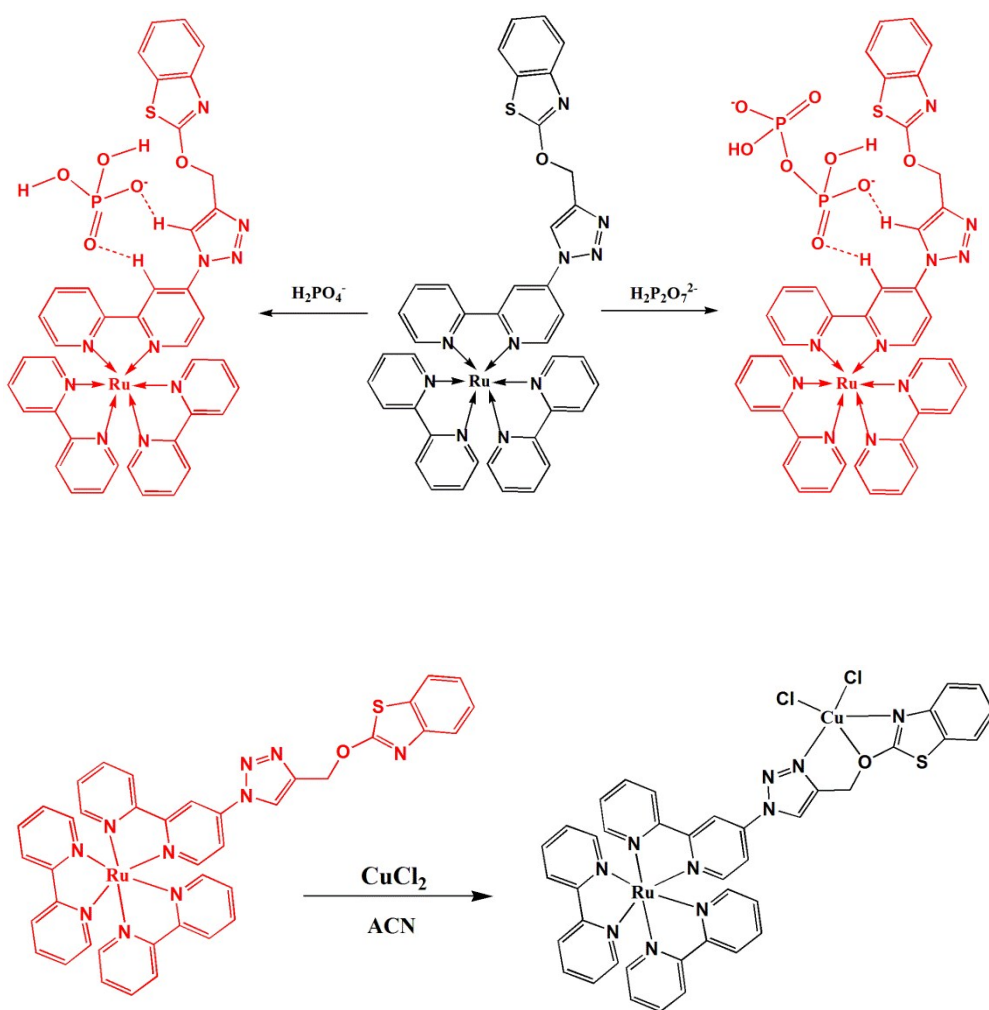

Fig. S28. Proposed mechanism of Rbtb- $\text{H}_2\text{PO}_4^-$ , Rbtb- $\text{H}_2\text{P}_2\text{O}_7^{2-}$  (above) and Rbtb-Cu<sup>2+</sup> (below)



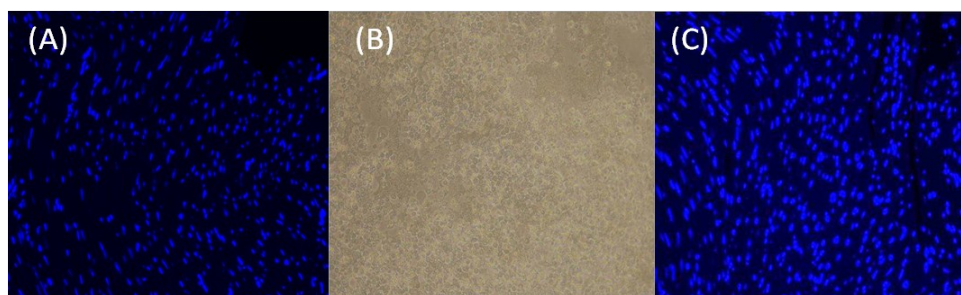

**Fig. S29.** DAPI staining of (A) MCF-7 cell lines (C) Rbtb treated MCF-7 cell line images under fluorescent spectra and (B) Normal image of MCF-7 cell lines.

**Table S1.** Comparative table for detection limit with existed sensing probes

| Probe Structure                                                                     | Detected Ion (Copper, phosphate) and detection Limit | Reference                                                     |
|-------------------------------------------------------------------------------------|------------------------------------------------------|---------------------------------------------------------------|
| 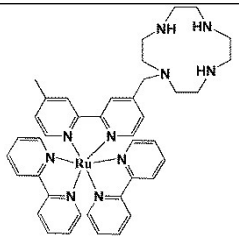  | Cu <sup>2+</sup> and 5.4 μM                          | <i>-Dalton Trans.</i> , 2013, <b>42</b> , 13509-13515.        |
|  | Cu <sup>2+</sup> and 0.08 μM                         | <i>-Chem. Eur. J.</i> , 2013, <b>19</b> , 15494-15503.        |
|  | Cu <sup>2+</sup> and 0.87 μM                         | <i>-Sensors and Actuators B</i> , 2017, <b>253</b> , 203-212. |
|  | Cu <sup>2+</sup> and 2.73 μM                         | <i>-Sensors and Actuators B</i> , 2015, <b>211</b> , 449-455. |

|                                                                                    |                                                                                                                                                                    |                                                               |
|------------------------------------------------------------------------------------|--------------------------------------------------------------------------------------------------------------------------------------------------------------------|---------------------------------------------------------------|
| 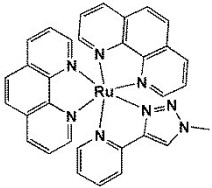  | $\text{H}_2\text{PO}_4^{2-}$ and 0.25 $\mu\text{M}$ ;<br>$\text{HP}_2\text{O}_7^{3-}$ and 0.45 $\mu\text{M}$                                                       | - <i>Inorg. Chem.</i> 2014, <b>53</b> ,<br>8061-8070.         |
|   | $\text{H}_2\text{PO}_4^{2-}$ and 0.806 $\mu\text{M}$                                                                                                               | - <i>Chin. J. Chem.</i> , 2018, <b>36</b> ,<br>1179-1181.     |
|   | $\text{H}_2\text{PO}_4^{2-}$ and 3.9 $\mu\text{M}$                                                                                                                 | - <i>Molecules</i> , 2017, <b>22</b> , 2273<br>(1-11).        |
|  | $\text{H}_2\text{PO}_4^{2-}$ and 3.5 $\mu\text{M}$                                                                                                                 | - <i>Org. Biomol. Chem.</i> ,<br>2013, <b>11</b> , 1537–1544. |
| In this Work                                                                       | $\text{Cu}^{2+}$ and 0.70 $\mu\text{M}$ ;<br>$\text{H}_2\text{PO}_4^{2-}$ and 0.22 $\mu\text{M}$ ;<br>$\text{H}_2\text{P}_2\text{O}_7^{2-}$ and 0.31 $\mu\text{M}$ | ---                                                           |

## References

- S1. K. M. Hosamani and R. V. Shingalapur, *Arch. Pharm. Chem. Life Sci.* 2011, **11**, 311-319.  
 S2. M. Ramachandran, S. Anandan and M. Ashokkumar, *New J. Chem.*, 2019, **43**, 9832-9842.  
 S3. B. S. Uppal, A. Zahid, P. I. P. Elliott, *Eur. J. Inorg. Chem.*, 2013, 2571-2579.
